# Supplementary material for: Multivariate Approaches in Quantitative Structure–Property Relationships Study for the Photostability Assessment of 1,4-Dihydropyridine Derivatives
Source: MDPI journal article supplement (doi:10.3390/pharmaceutics16020206), 2024-01-31

**Figure S1-20.** Photodegradation experiments of each tested compound at a concentration of  $20.0 \mu\text{g mL}^{-1}$ . A: Spectral sequences; B: concentration profiles of the pure compounds and the photoproducts obtained from MCR elaboration and C: relative absorbance spectra.

**Figure S1.** DA1.

**A**

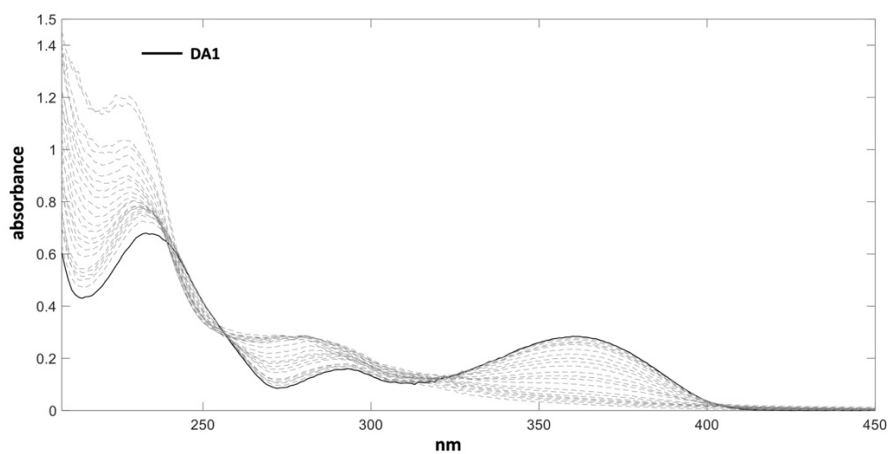

**B**

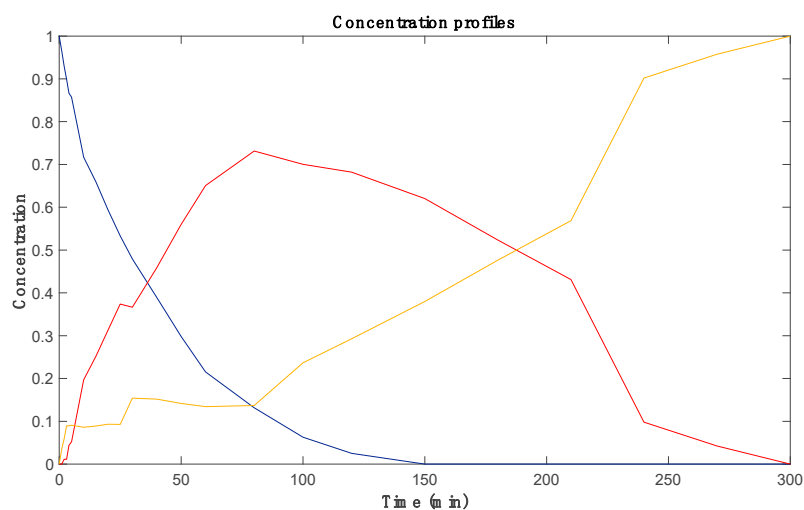

**C**

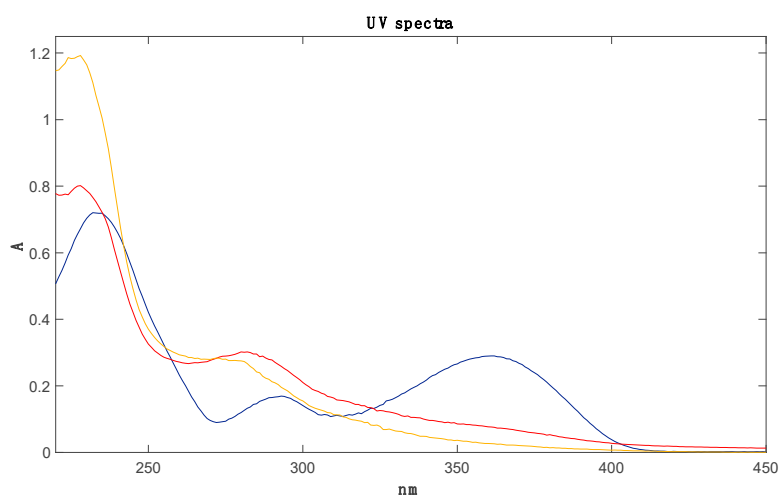

Figure S2. DA2.

A

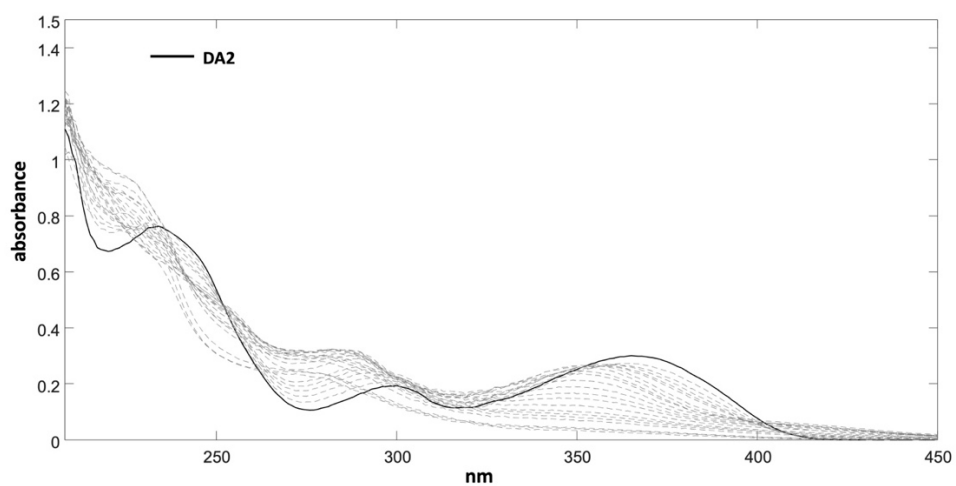

B

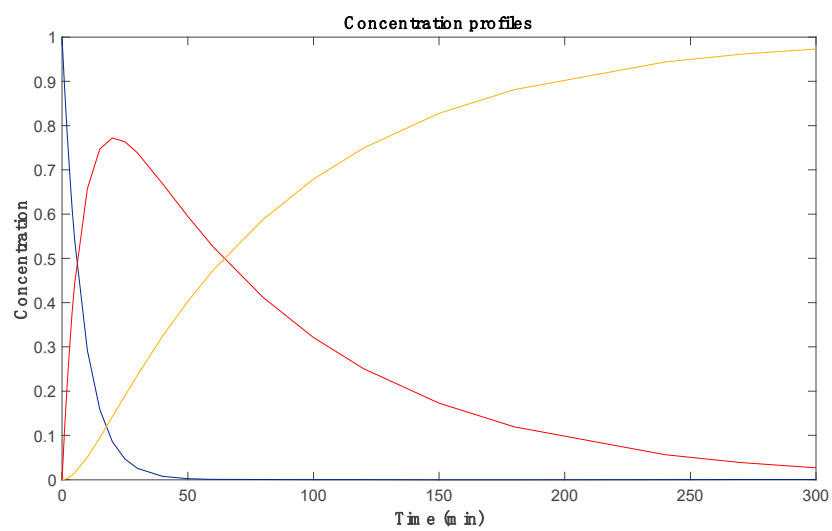

C

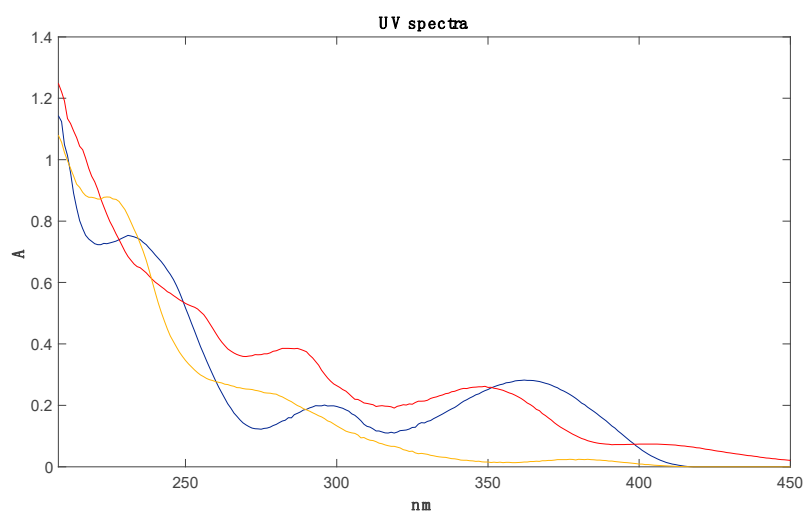

Figure S3. DA3.  
A

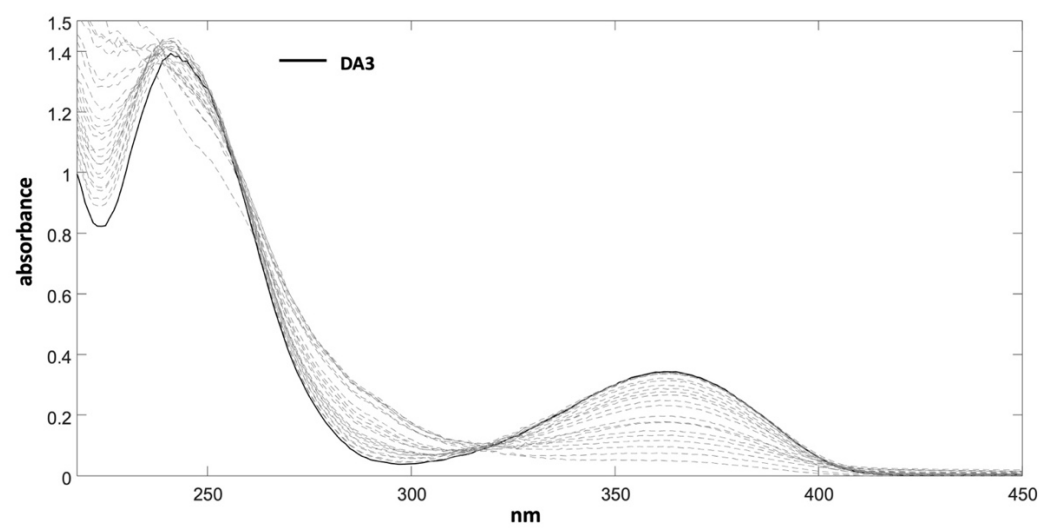

B

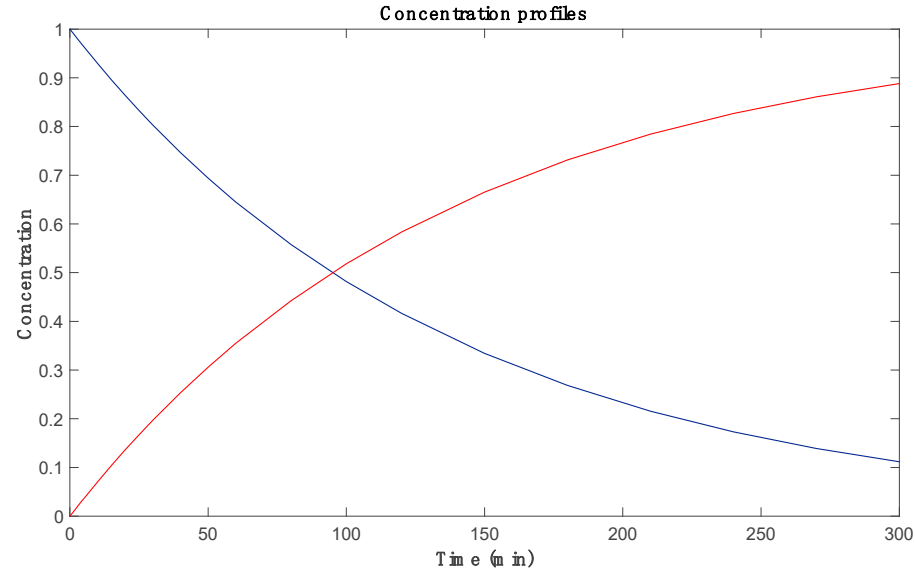

C

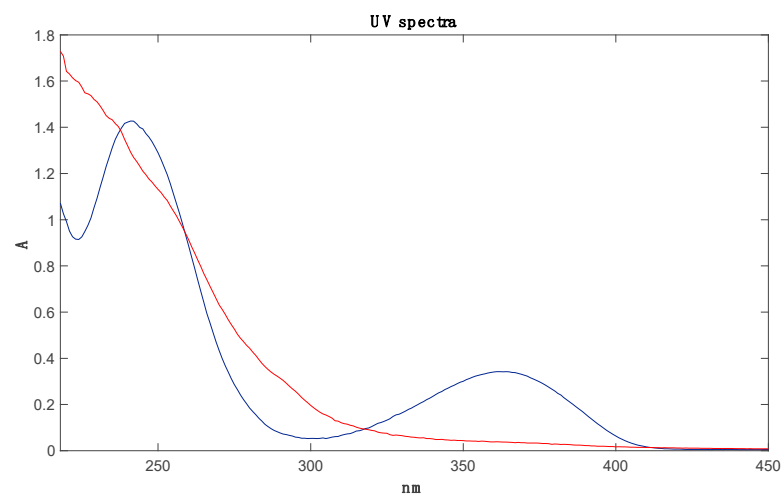

Figure S4. DA4.  
A

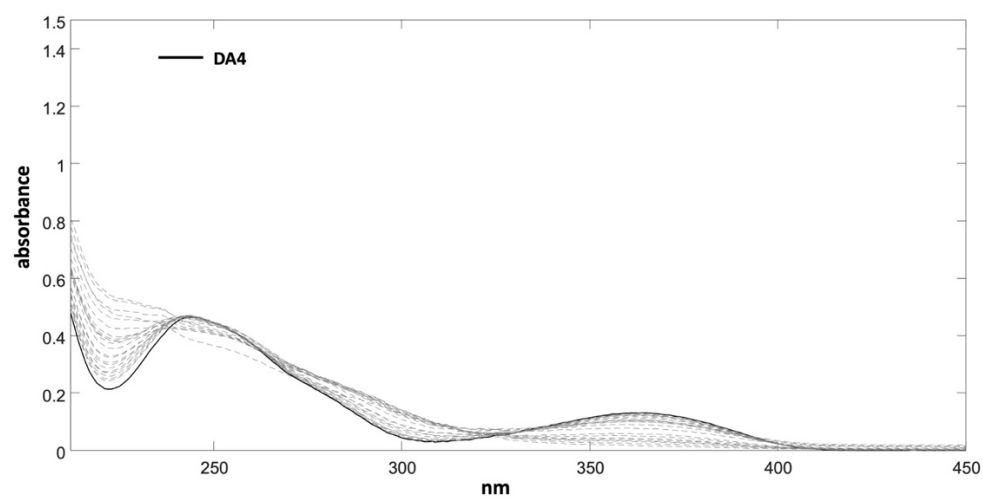

B

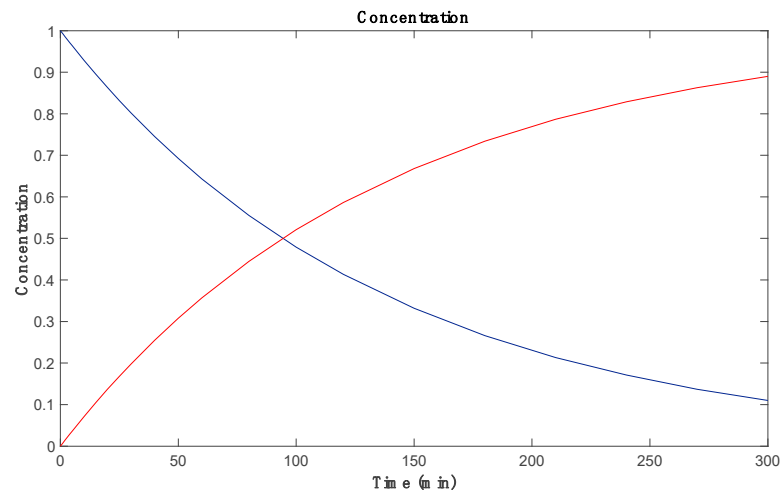

C

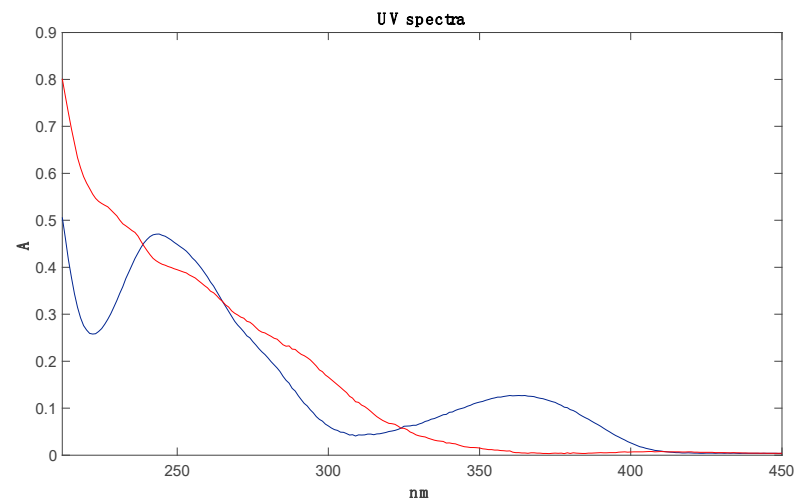

Figure S5. DA5.  
A

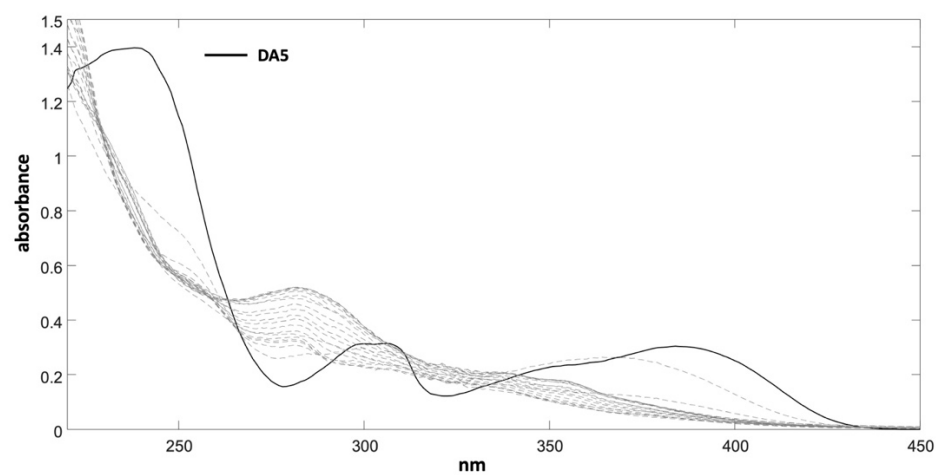

B

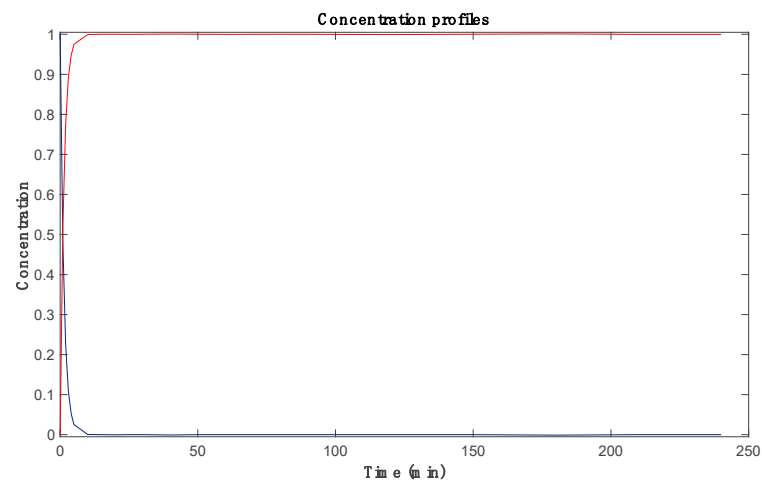

C

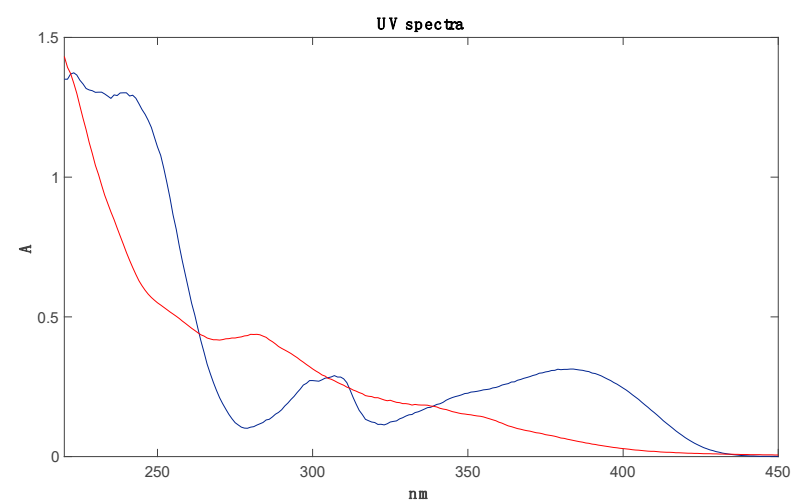

Figure S6. DA6.

A

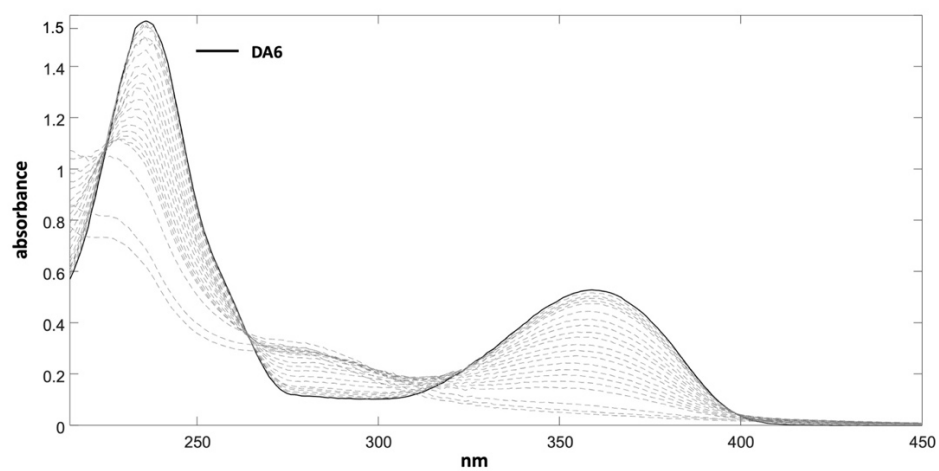

B

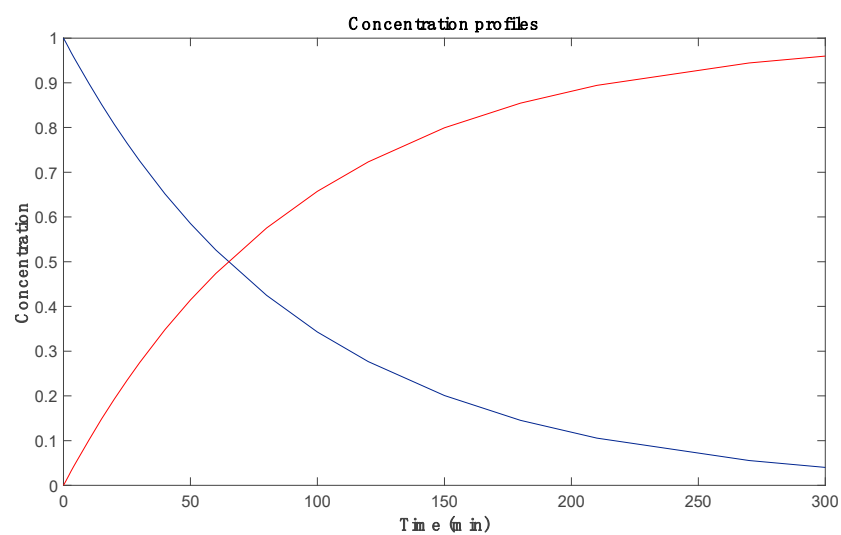

C

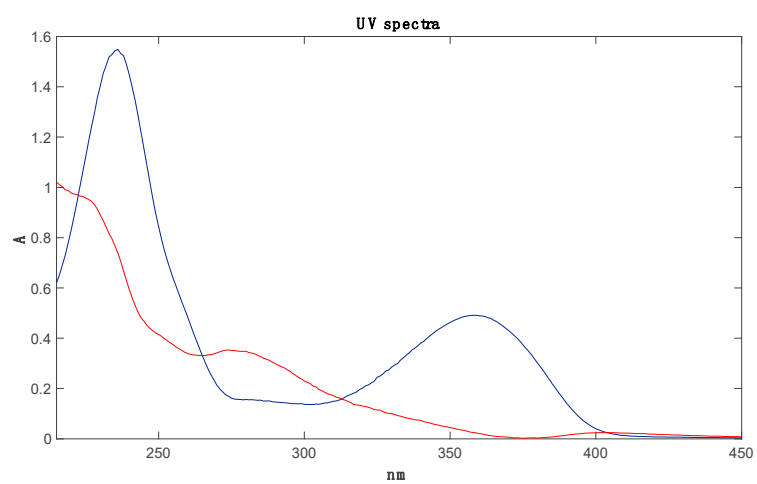

Figure S7. DA7.

A

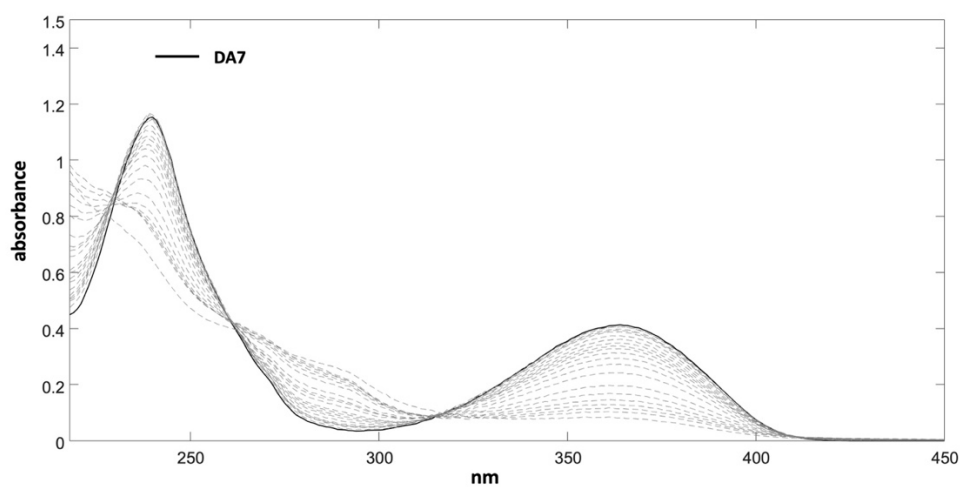

B

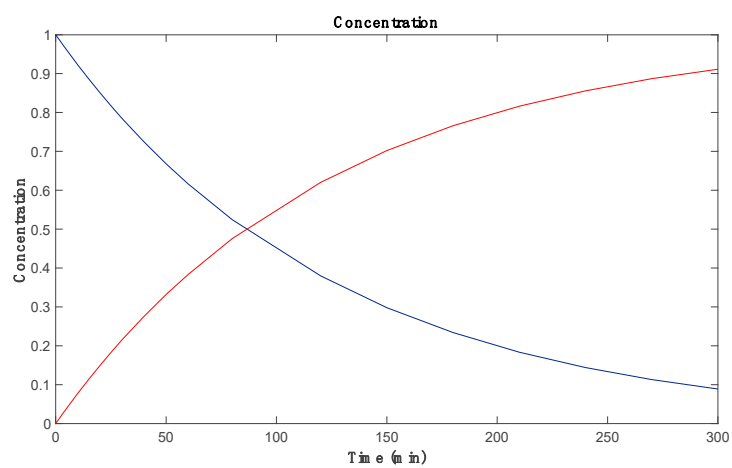

C

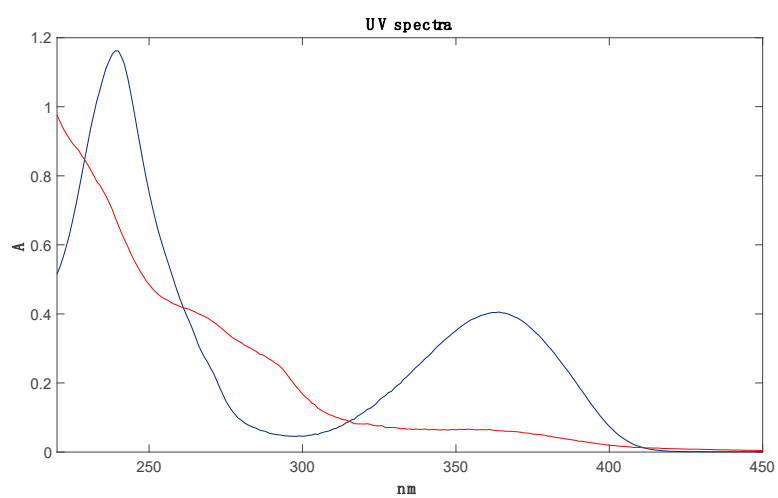

Figure S8. DA8.

A

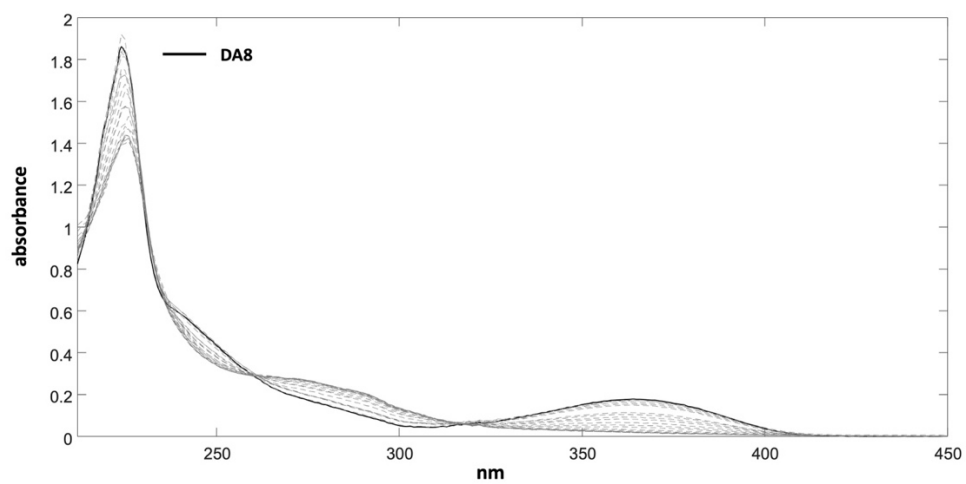

B

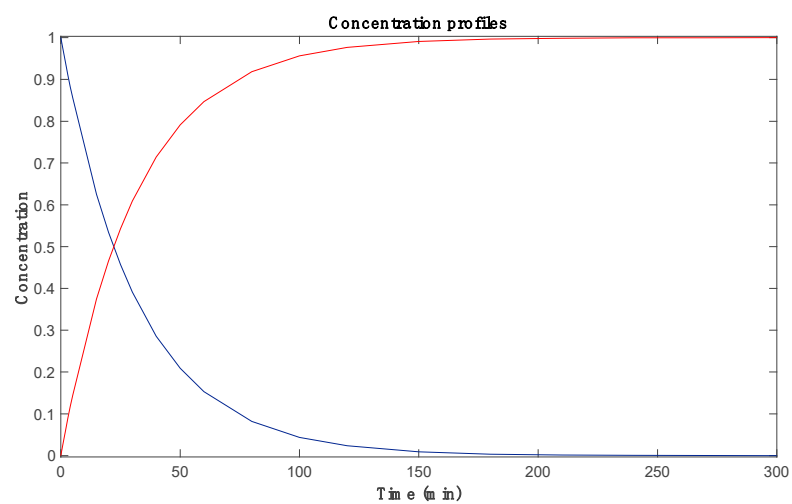

C

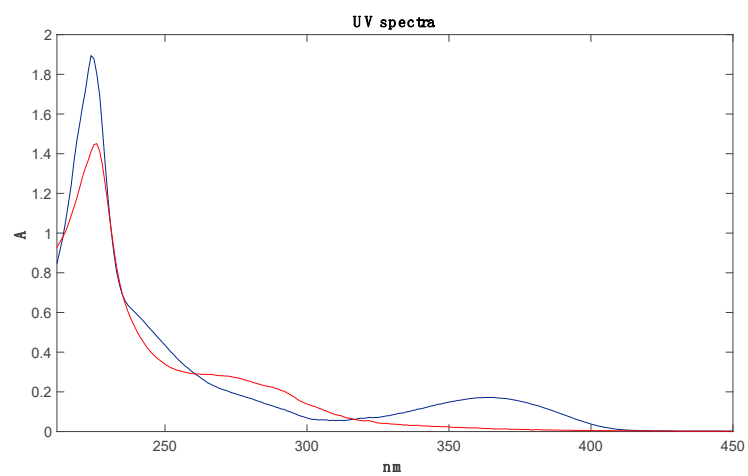



Figure S9. DA10.

A

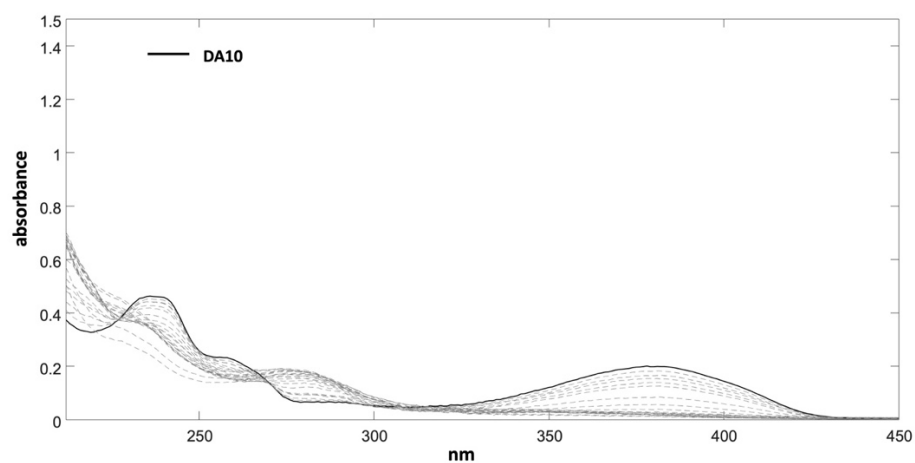

B

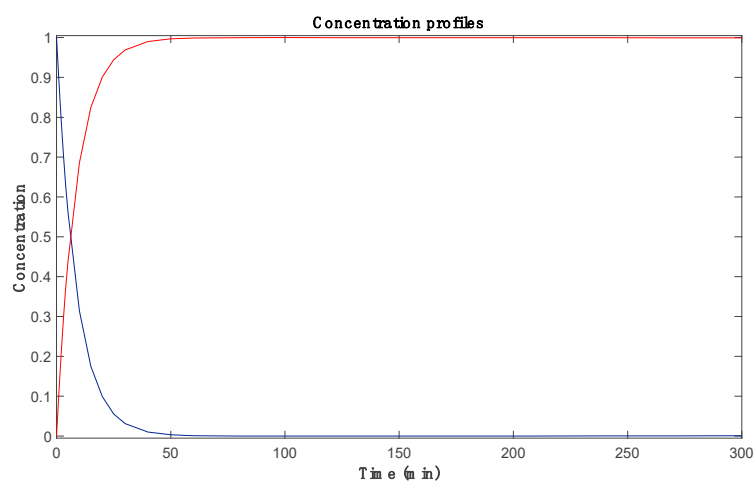

C

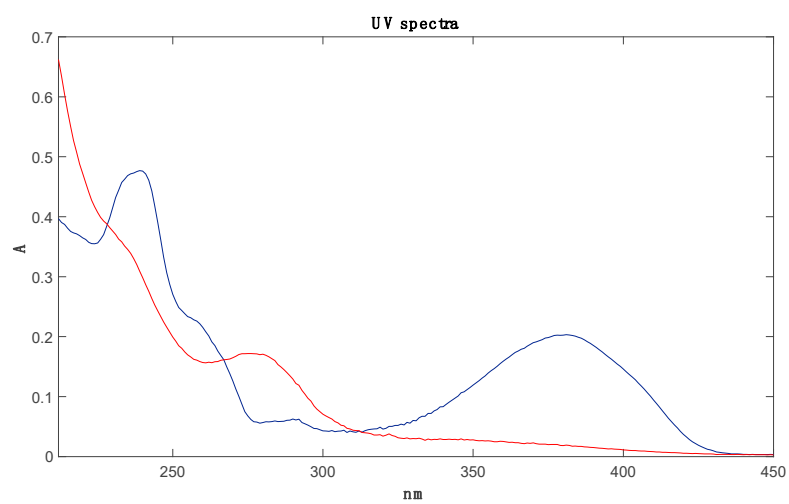

Figure S10. DA11.  
A

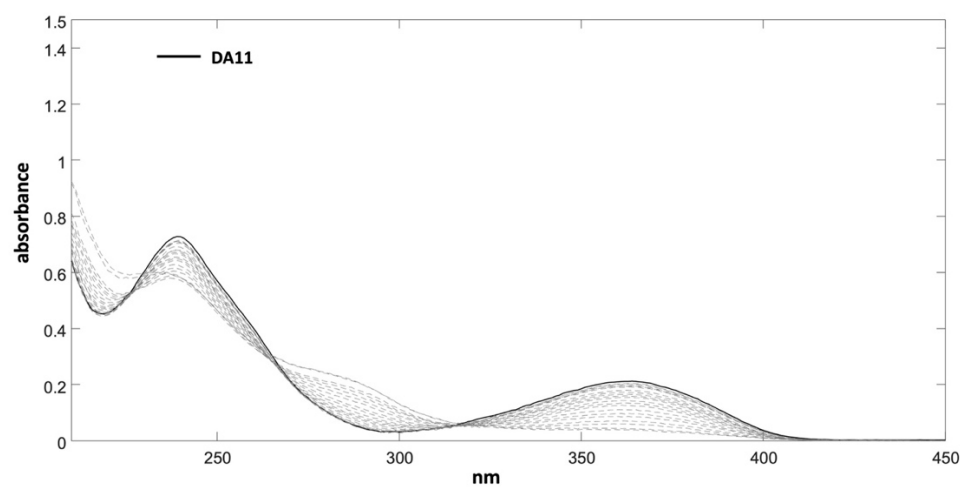

B

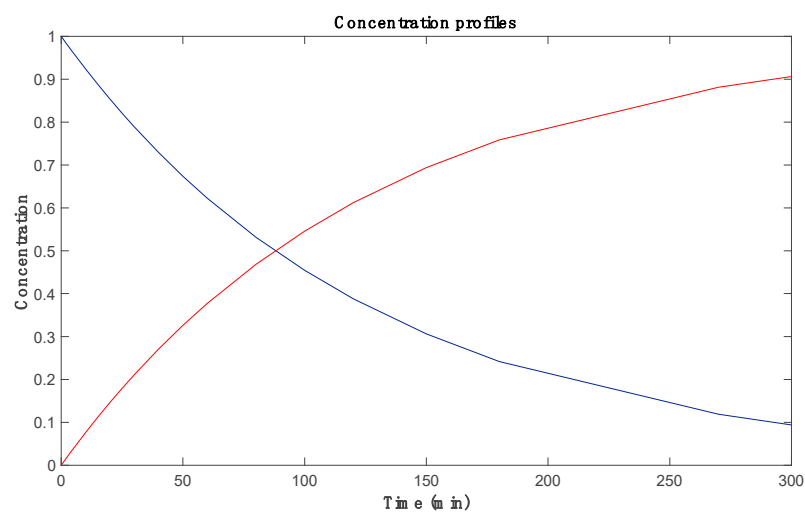

C

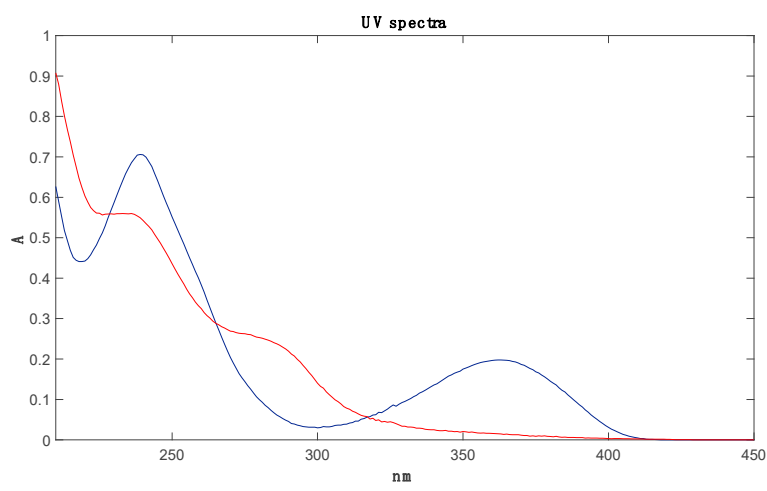

Figure S11. DA12.

A

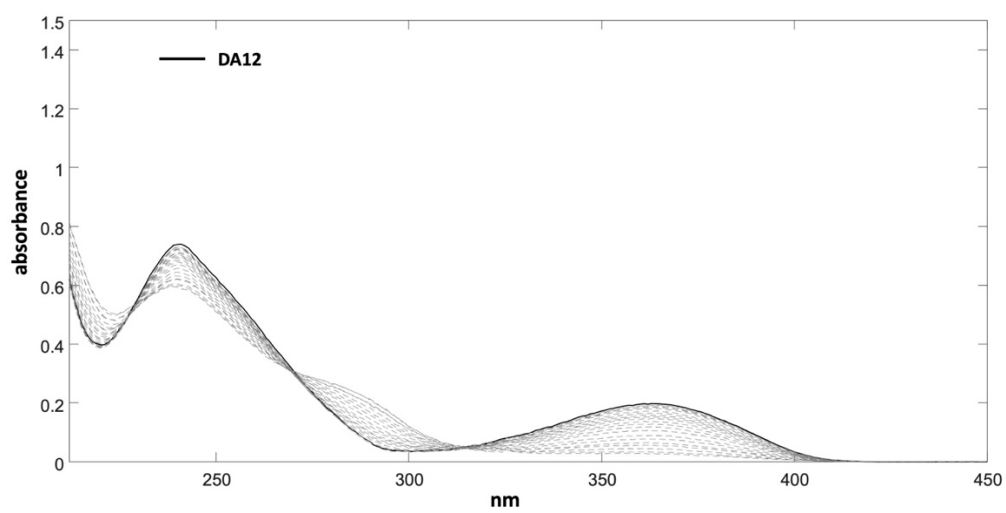

B

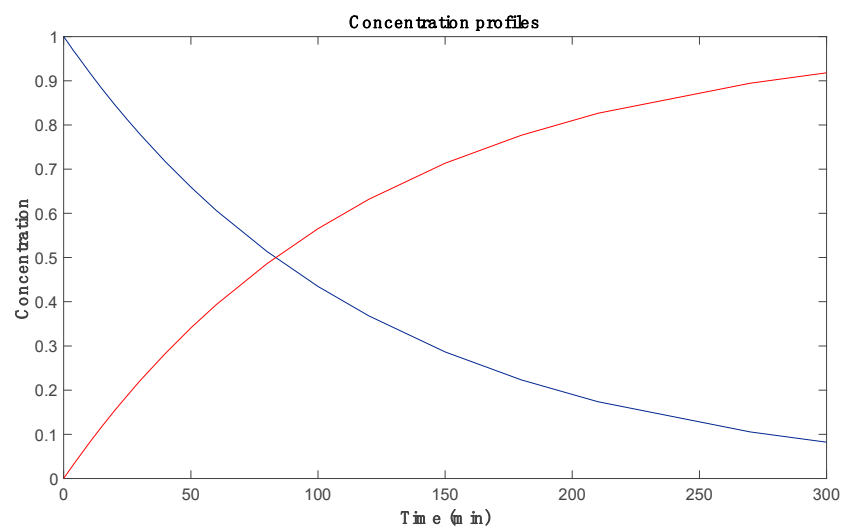

C

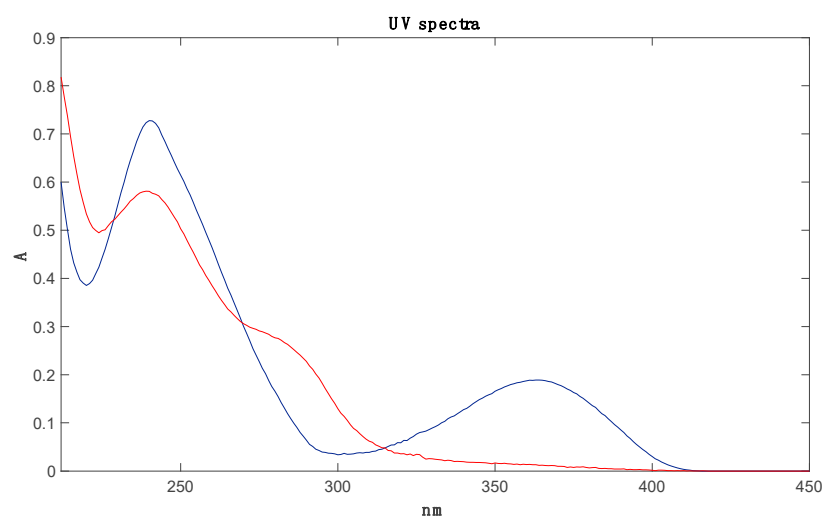

Figure S12. HM8.  
A

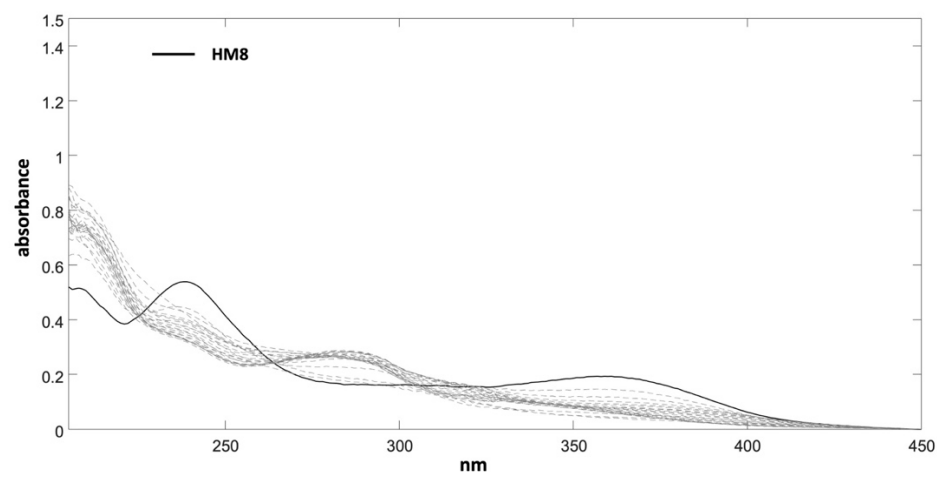

B

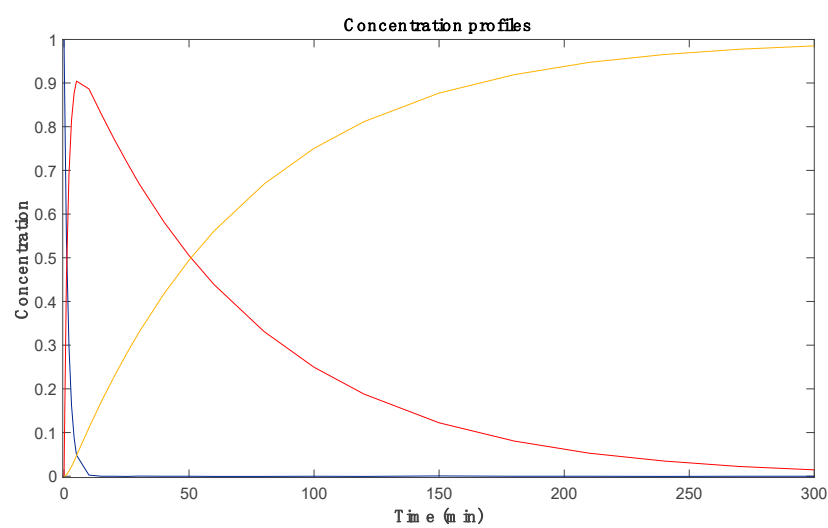

C

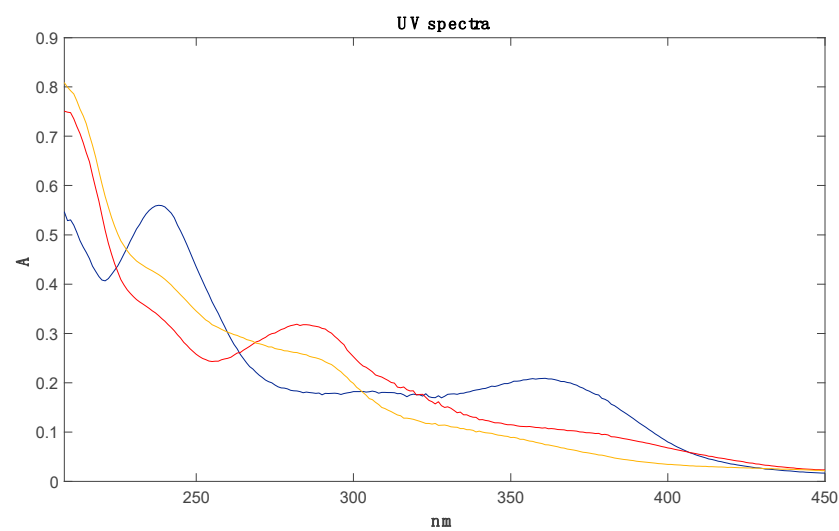

Figure S13. HM10.

A

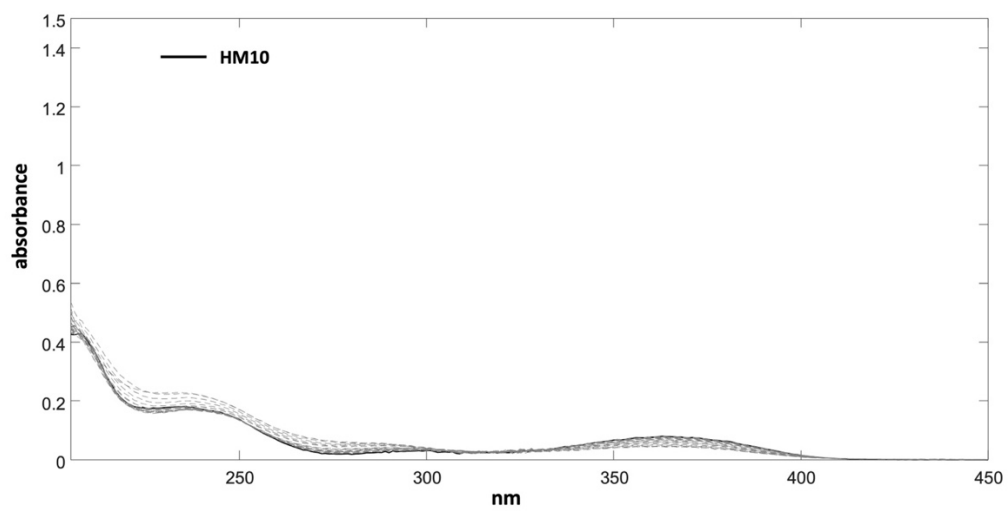

B

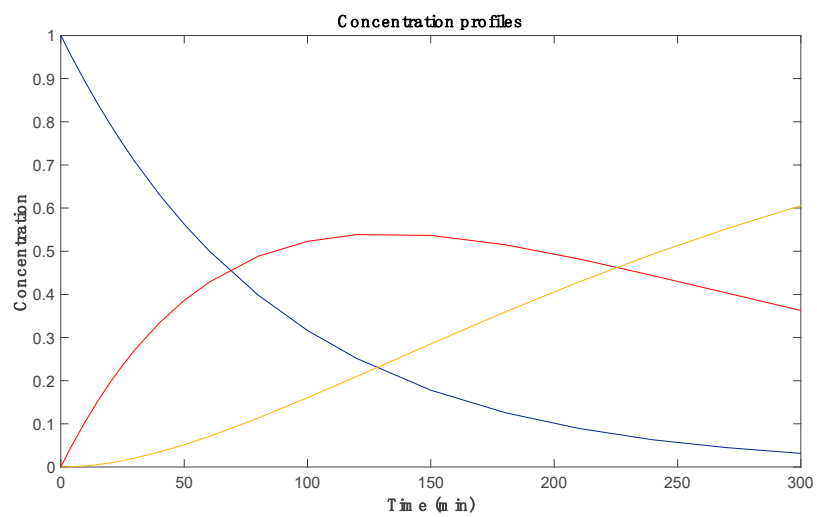

C

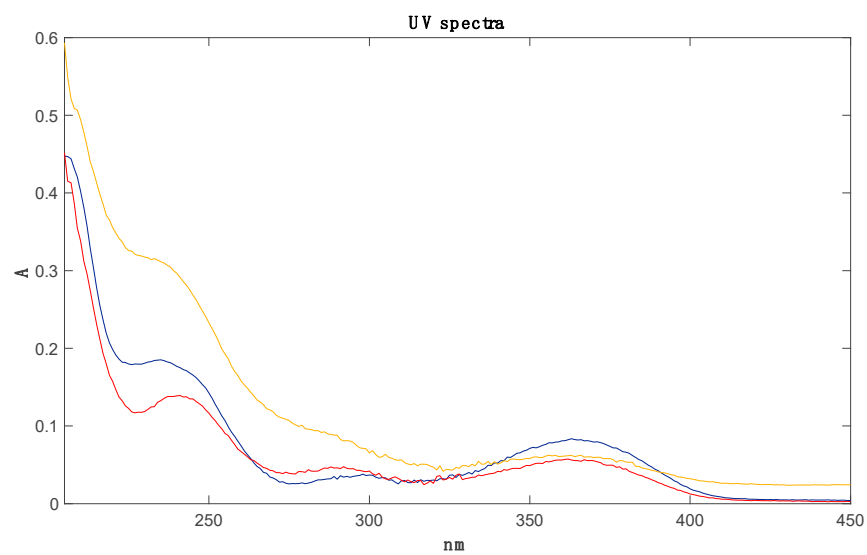

Figure S14. HM13.

A

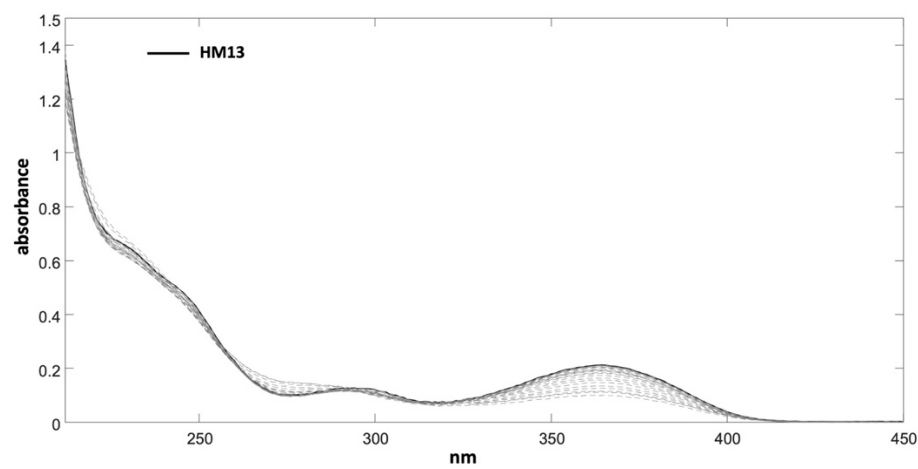

B

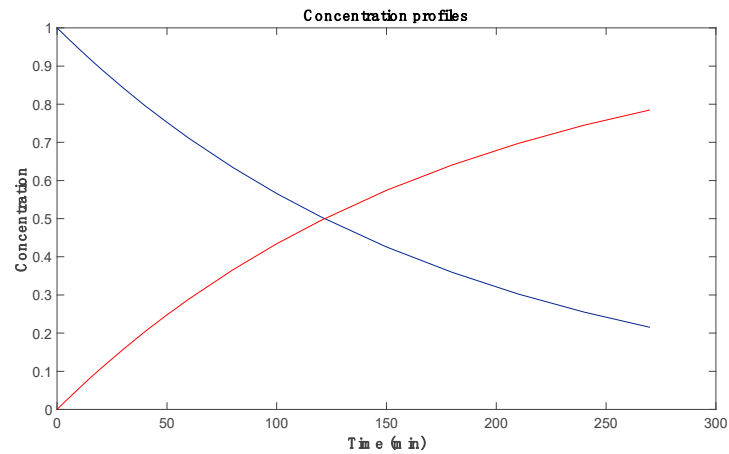

C

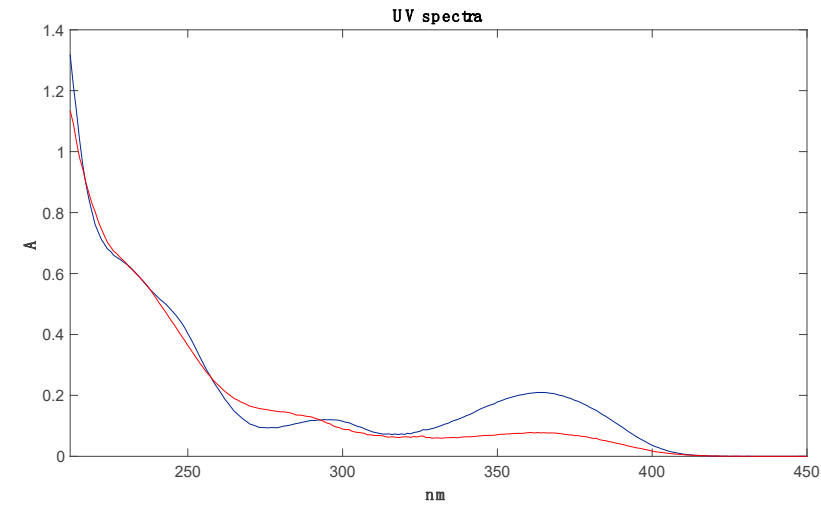

Figure S15. HM14.

A

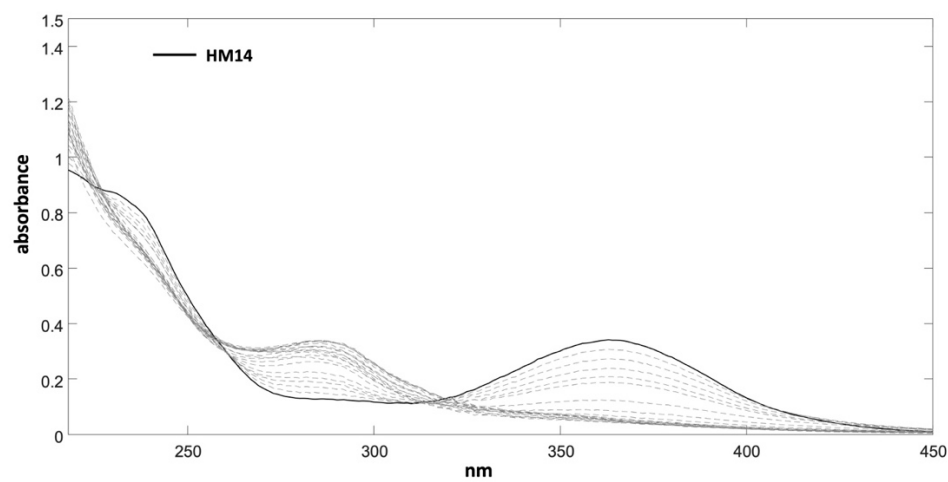

B

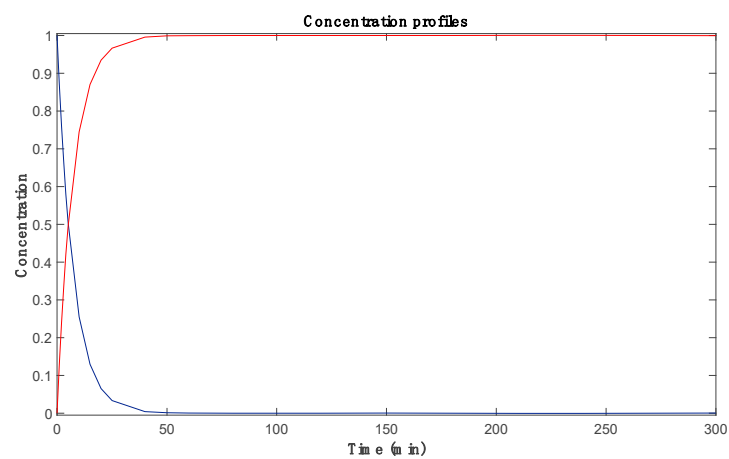

C

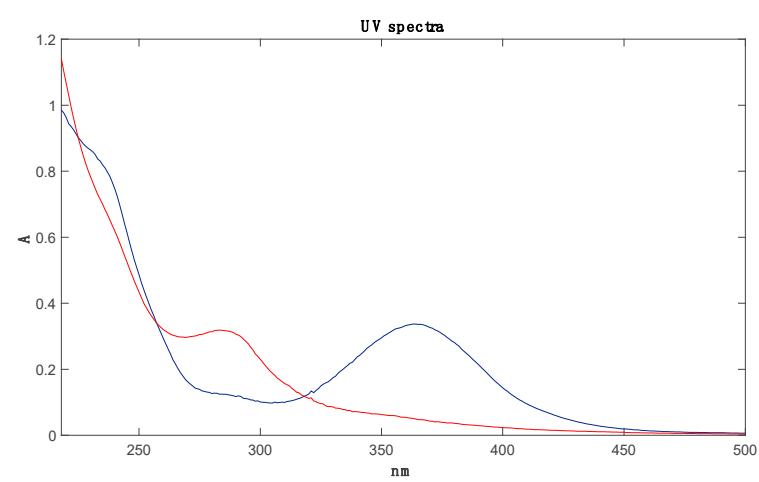

Figure S16. HM15.

A

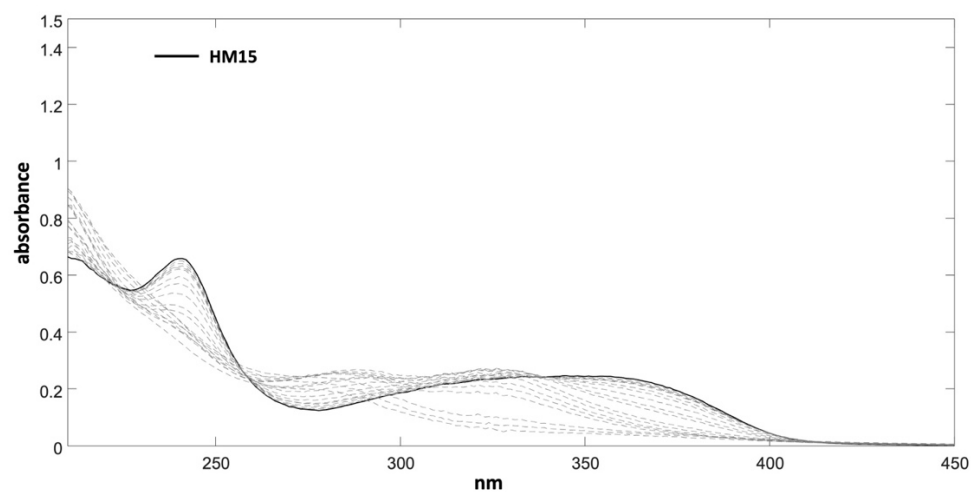

B

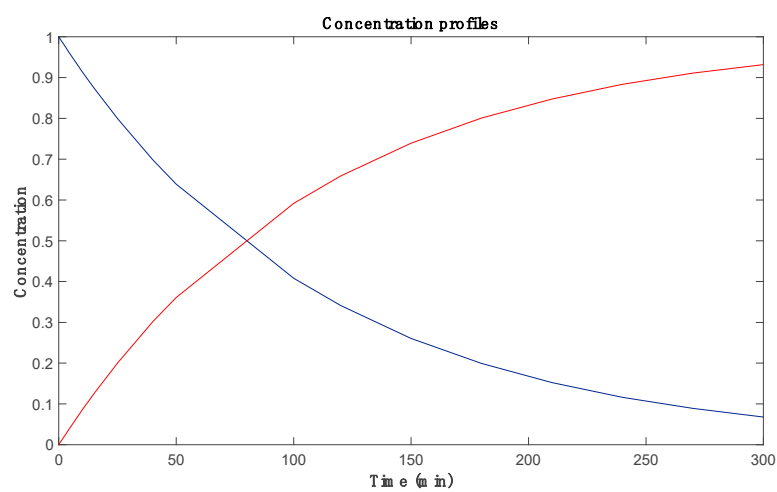

C

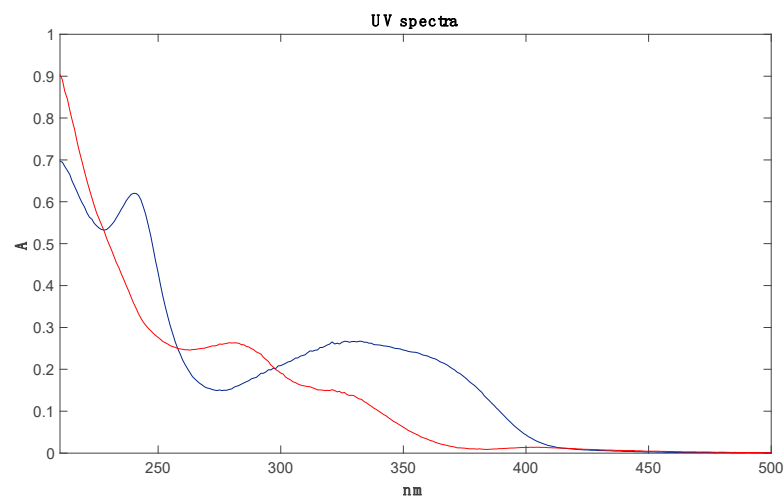



Figure S17. MD20.

A

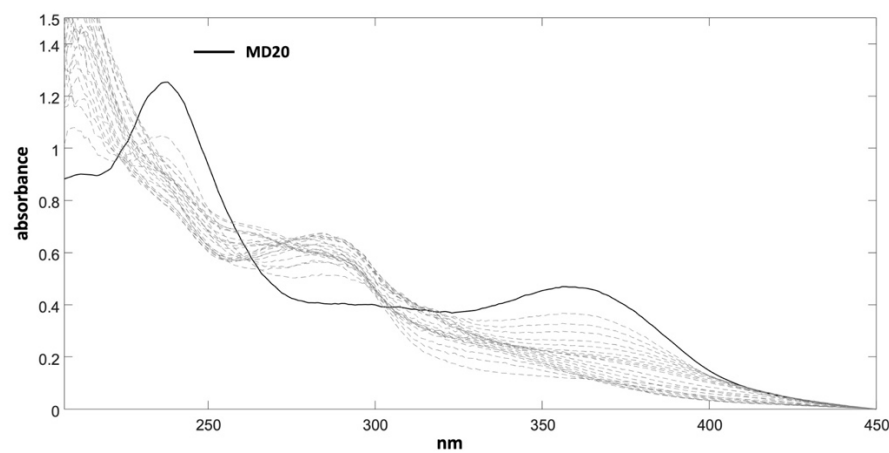

B

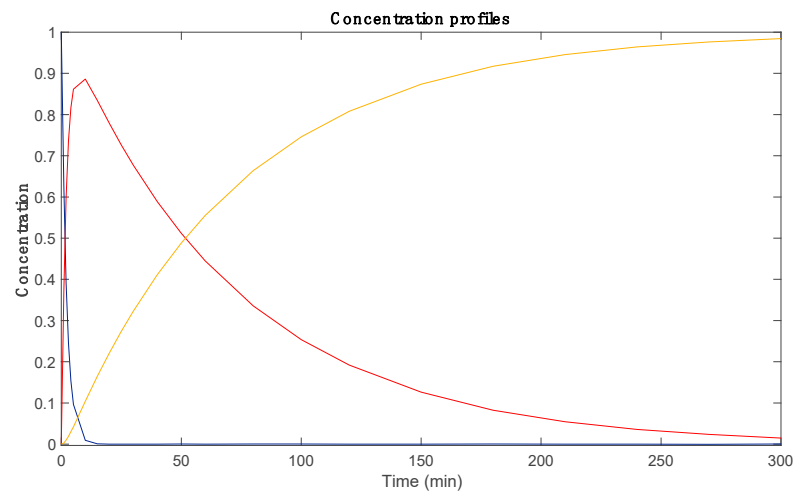

C

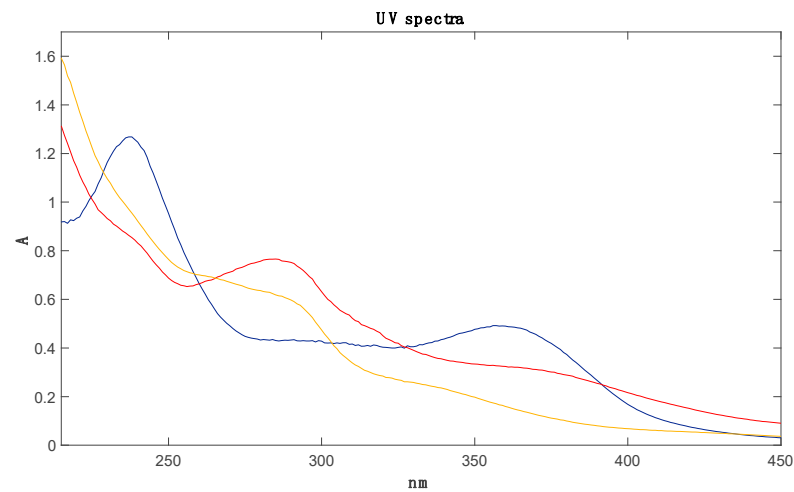

Figure S18. M3.

A

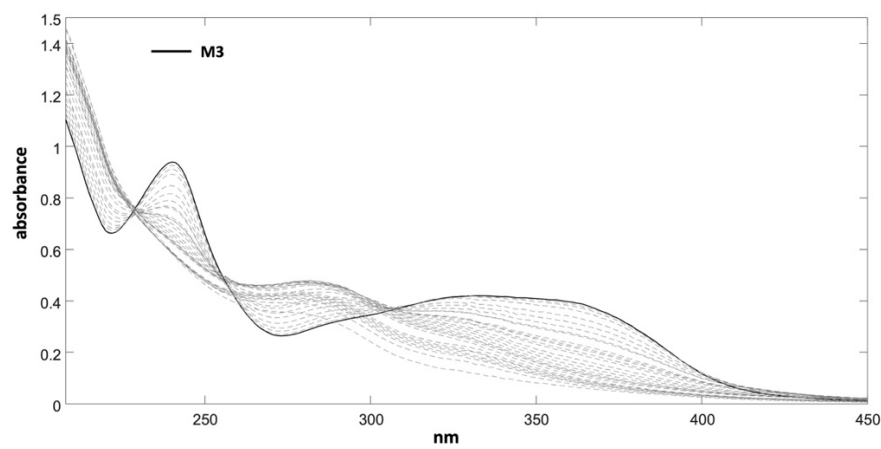

B

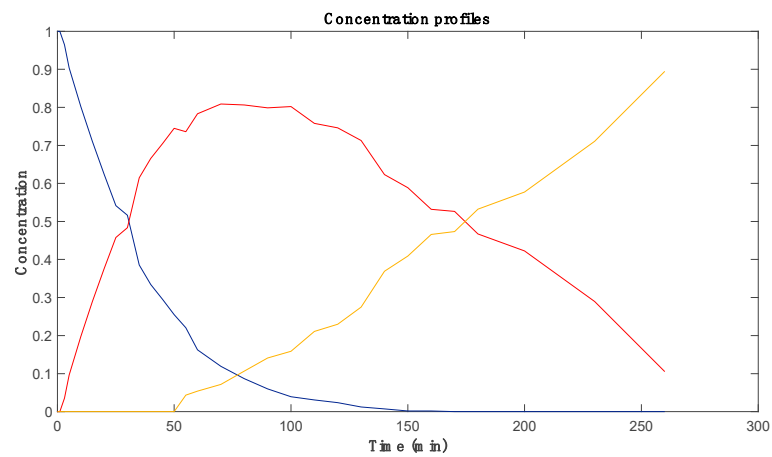

C

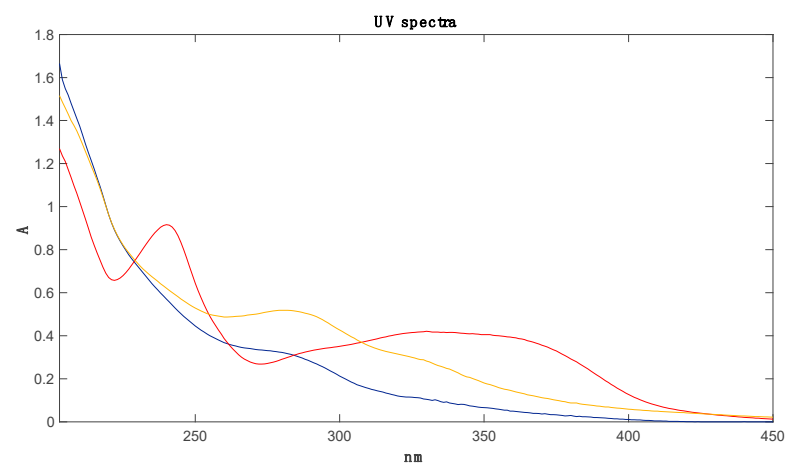

Figure S19. NIMO.

A

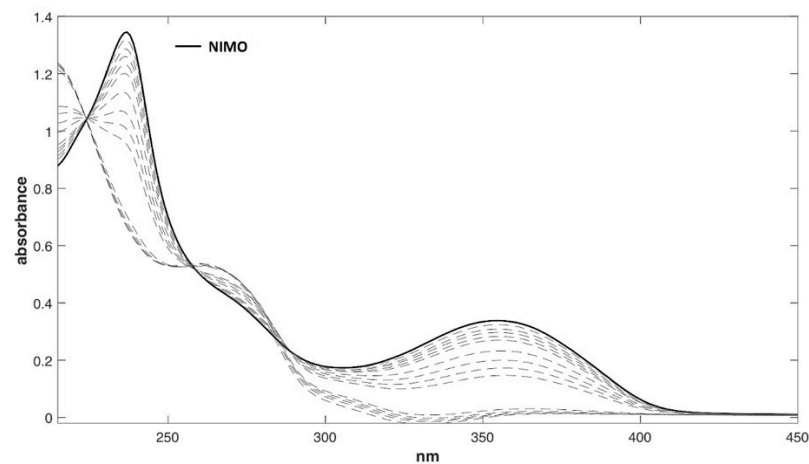

B

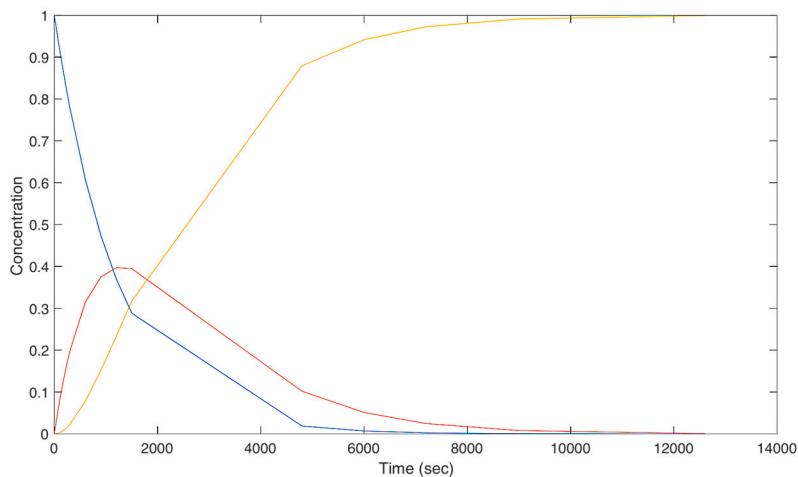

C

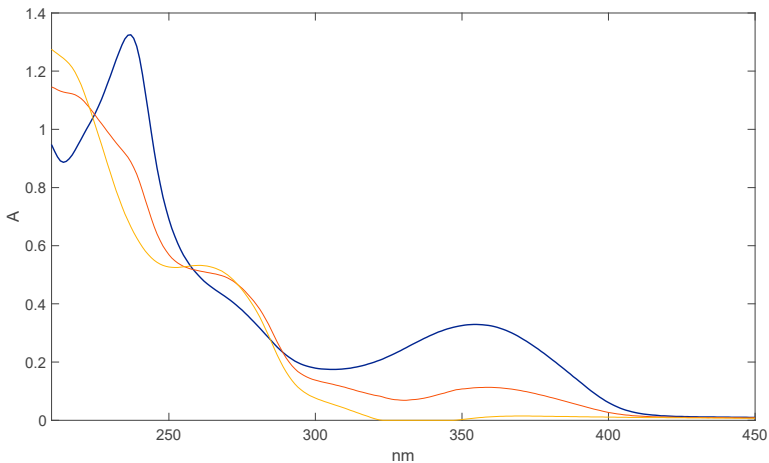

Figure S20. NICA.

A

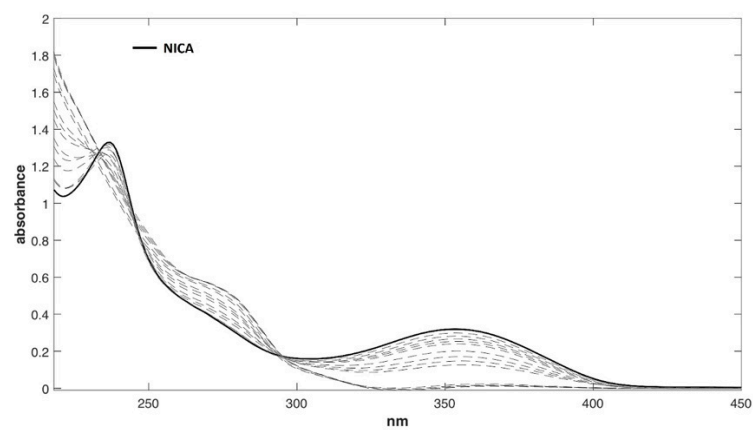

B

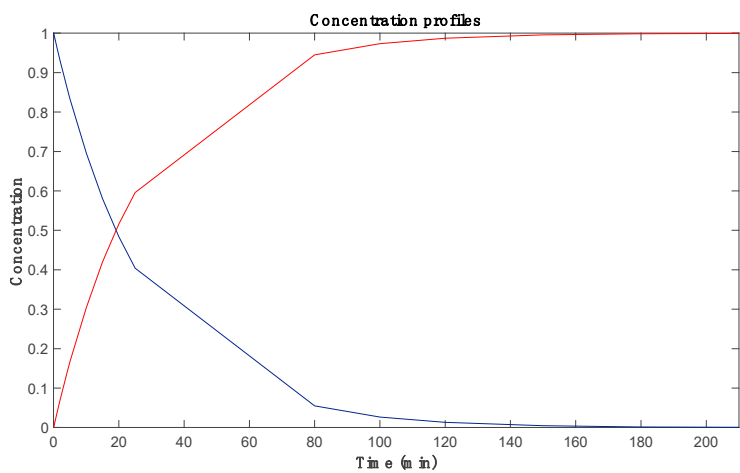

C

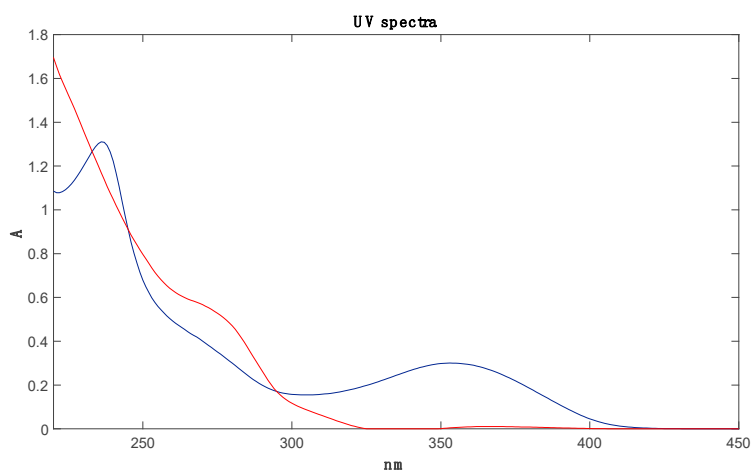

Figure S21. Scores plot.

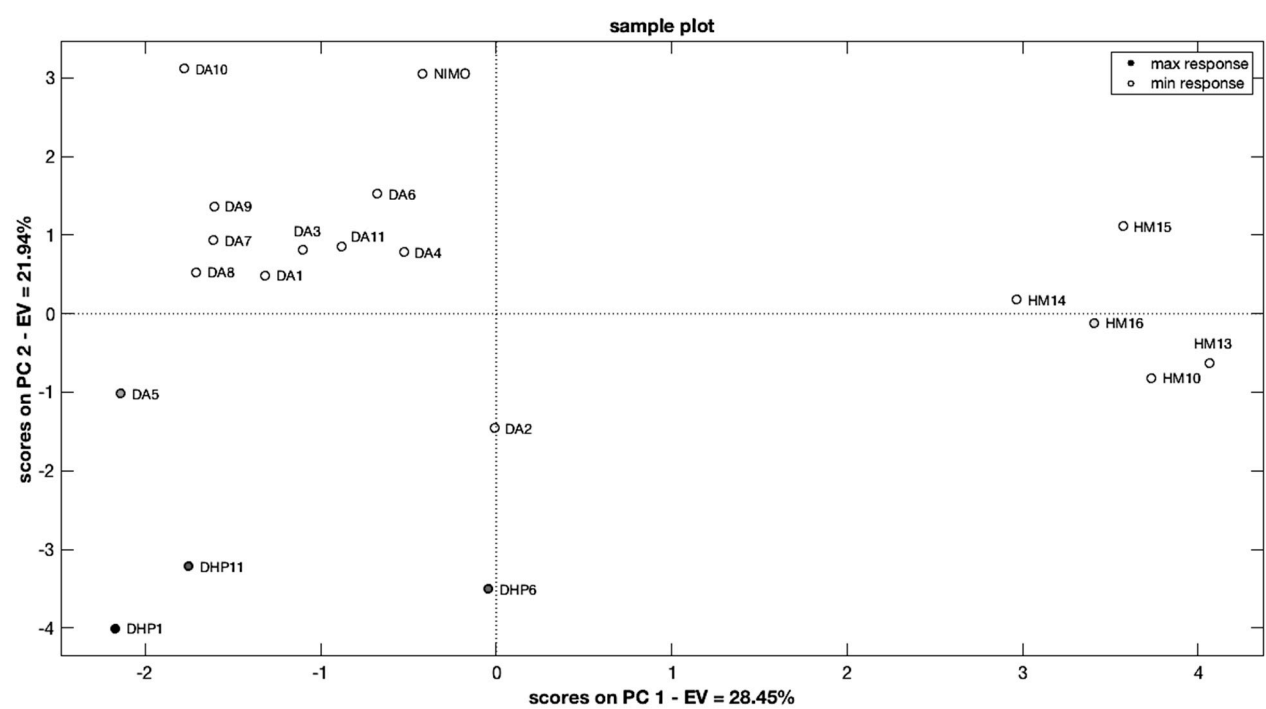

Figure S22. X-loadings plot.

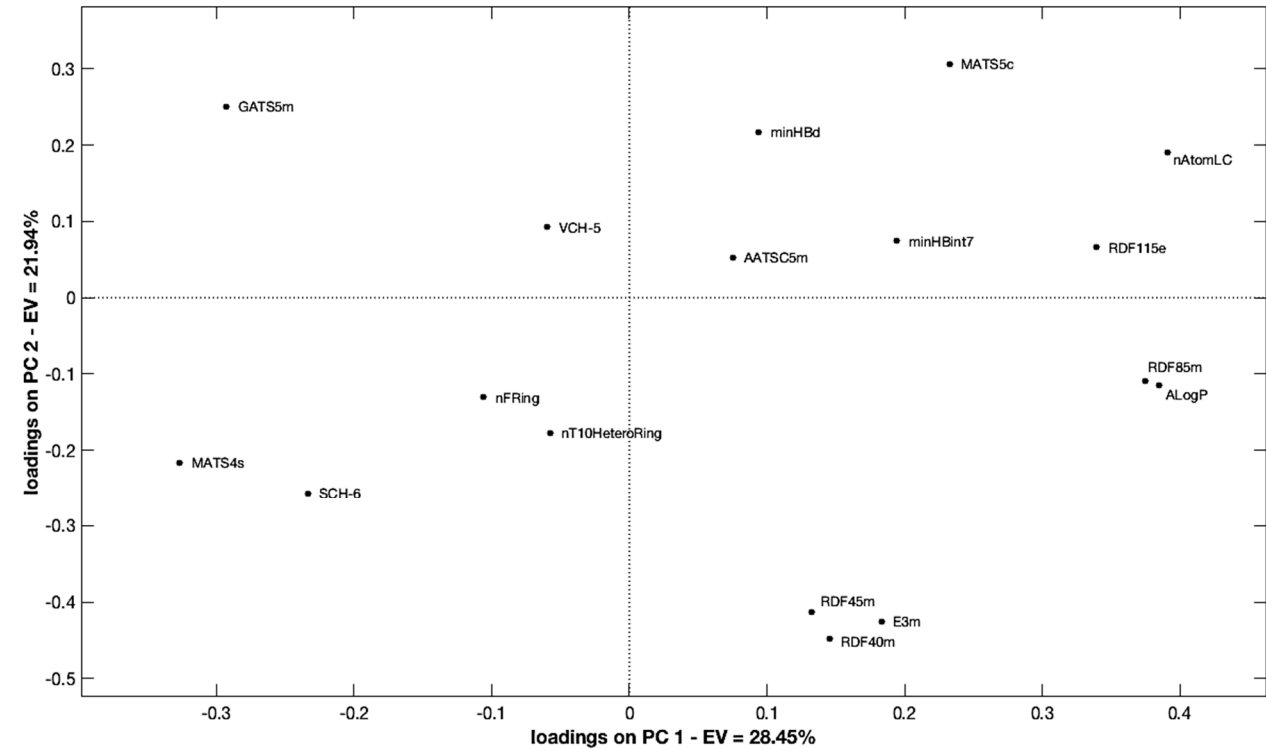

Supplement: s1 [file s1]
